# Supplementary material for: Variously Prepared Zeolite Y as a Modifier of ANFO
Source: MDPI journal article supplement (doi:10.3390/ma15175855), 2022-08-25
Supplement: s1 [file s1]

# Variously Prepared Zeolite Y as a Modifier of ANFO

Łukasz Kuterasiński <sup>1,\*</sup>, Agnieszka M. Wojtkiewicz <sup>1</sup>, Marta Sadowska <sup>1</sup>, Paulina Żeliszewska <sup>1</sup>, Bogna D. Napruszewska <sup>1</sup>, Małgorzata Zimowska <sup>1</sup>, Mateusz Pytlik <sup>2,\*</sup> and Andrzej Biessikirski <sup>3,\*</sup>

<sup>1</sup> Jerzy Haber Institute of Catalysis and Surface Chemistry, Polish Academy of Sciences, 8 Niezapominajek Street, 30-239 Kraków, Poland

<sup>2</sup> Conformity Assessment Body, Central Mining Institute, 1 Gwarków Square, 40-166 Katowice, Poland

<sup>3</sup> AGH University of Science and Technology, Faculty of Civil Engineering and Resource Management, 30 Mickiewicz Avenue, 30-059 Kraków, Poland

\* Correspondence: lukasz.kuterasiński@ikifp.edu.pl (Ł.K.); mpytlik@gig.eu (M.P.); abiess@agh.edu.pl (A.B.).

## The modification of zeolite Y with Mg

### a) impregnation (Mg- $Y_{impr}$ )

6 g of a dry zeolite Na-Y (Inowrocław-Mątwy) was impregnated with a 5.33 g of  $Mg(NO_3)_2 \cdot 6H_2O$  (Sigma-Aldrich, ACS>99%). Afterward, the resulting slurry was dried overnight at 80 °C.

### b) ion-exchange (Mg- $Y_{ion-exch}$ )

A Fivefold  $Na^+/NH_4^+$  ion-exchange procedure of zeolite Y (30 g) was conducted using 500 ml of 0.5 M aqueous magnesium nitrate at 80 °C for 2 h.

### c) ultrasonic-assisted impregnation (Mg- $Y_{son}$ )

In the ultrasonic method, zeolite Y (5g) was immersed in 0.5 M aqueous magnesium nitrate solution (200 ml) and treated with ultrasounds for 30 min using QSonica Q-700 sonicator (Church Hill Rd, Newtown, CT, USA) equipped with a “1/2” diameter horn (the average power of sonication was 60 W and frequency was 20 kHz). During the sonication procedure, the glass tube filled with the zeolite precursor was placed in an ice bath in order to maintain room temperature.

**Final treatment:** Mg-Y zeolites obtained according to procedures denoted as a), b) and c) subjected to a triple centrifugation (4200 RPM for 10 min), drying overnight at 80 °C and the calcination at 500 °C for 4 h in airflow (50 ml/min).

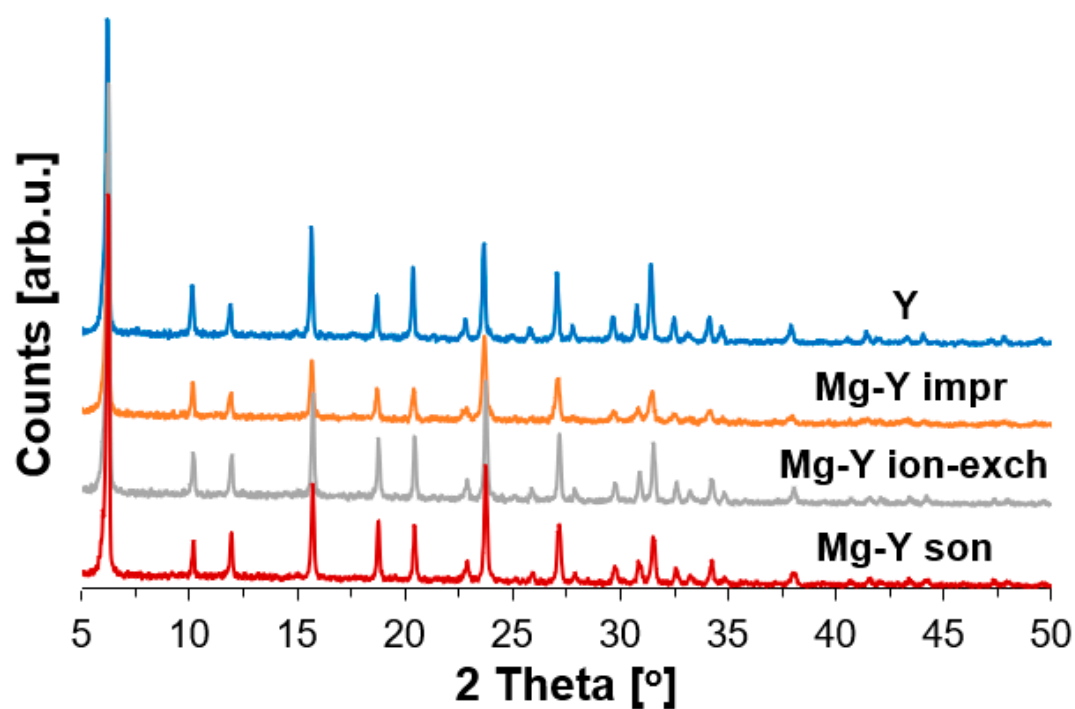

Figure S1. XRD patterns of the variously modified Y-type zeolites.

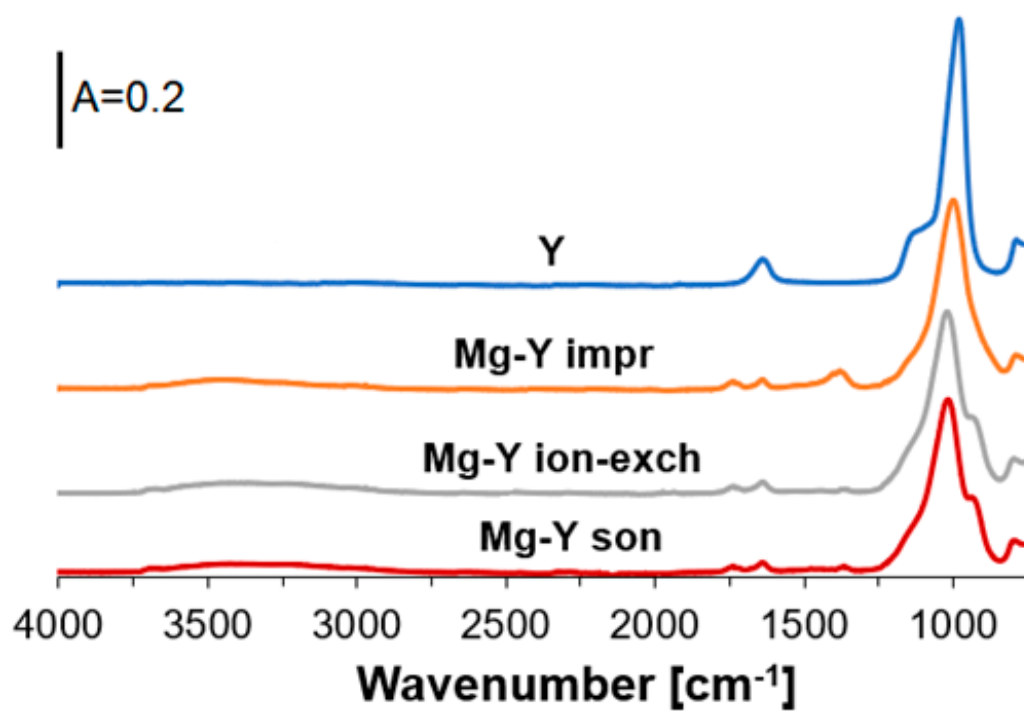

Figure S2. FT-IR spectra of the variously modified Y-type zeolites.

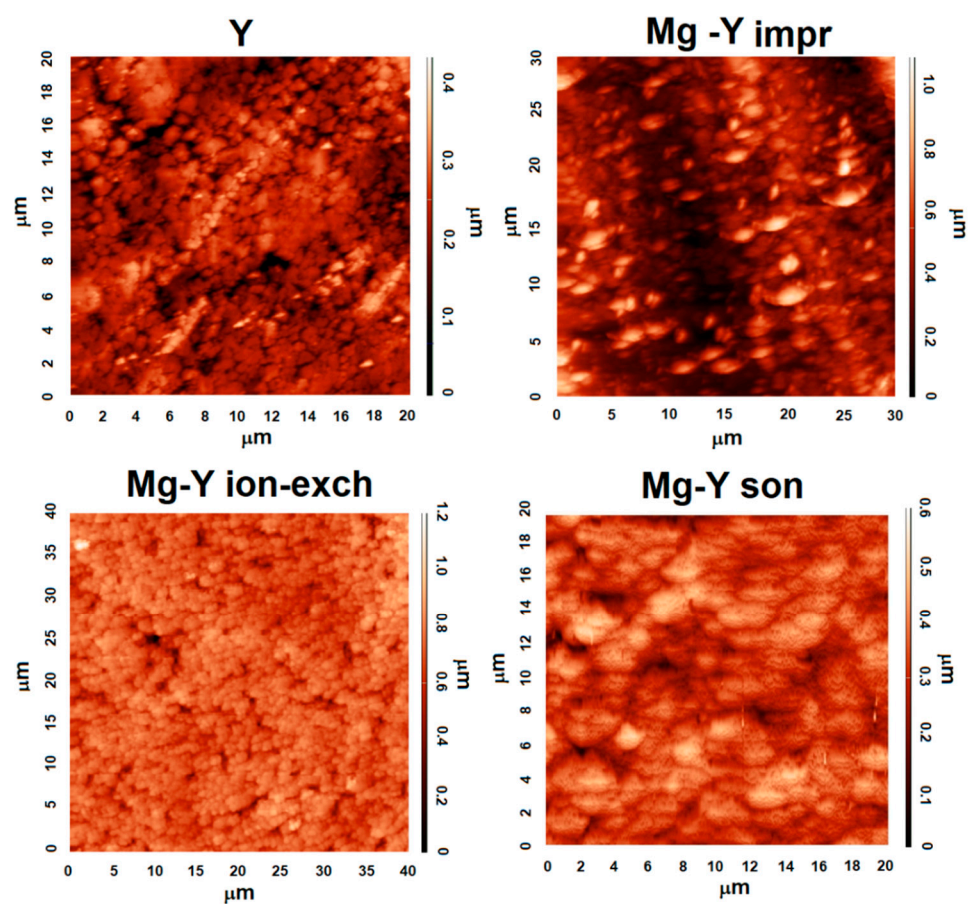

Figure S3. AFM images of the surface of variously modified Y-type zeolites.

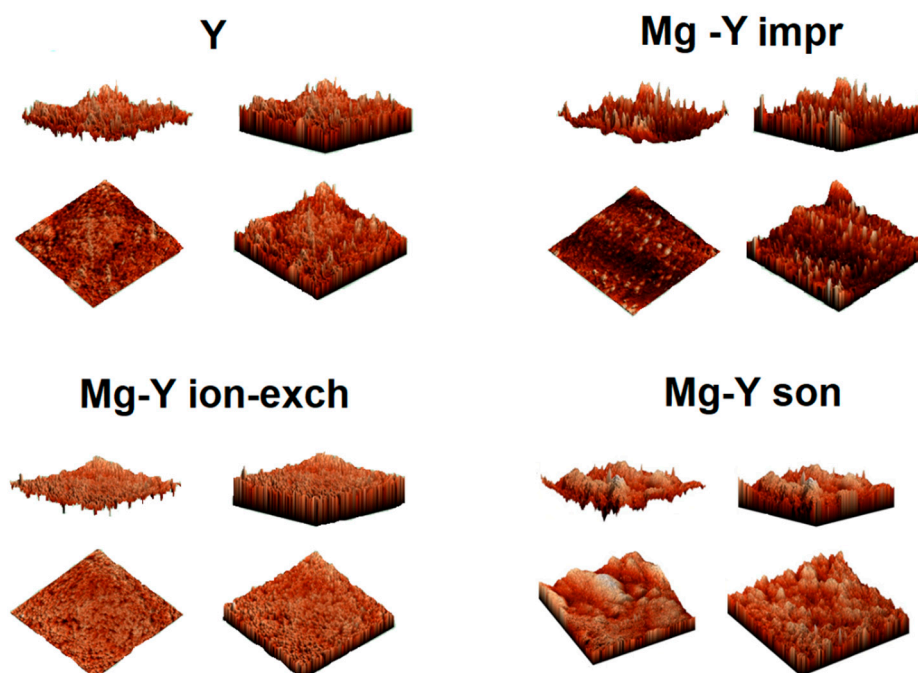

Figure S4. AFM visualization of the surface of variously modified Y-type zeolites in different projections.

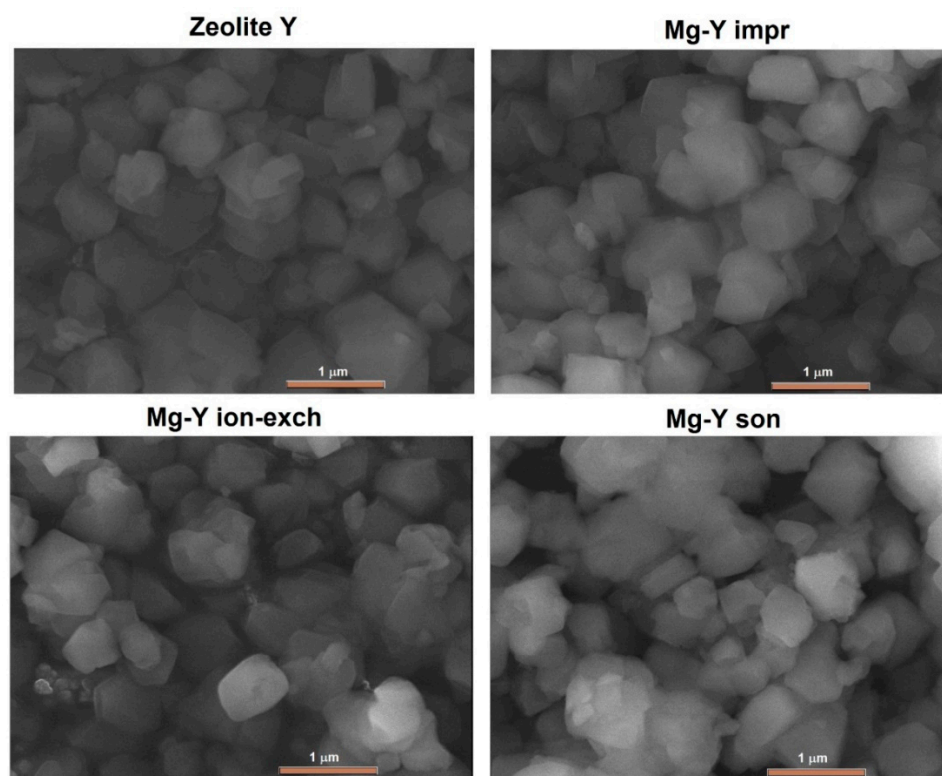

Figure S5. SEM images of variously modified Y-type zeolites.

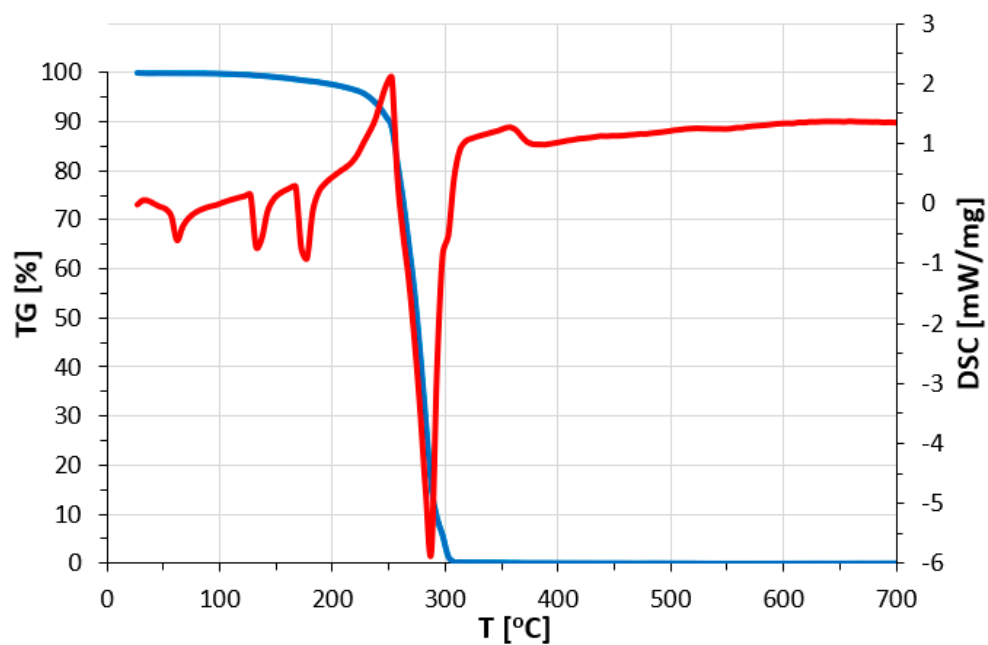

Figure S6. TG/DSC profiles for sample A.

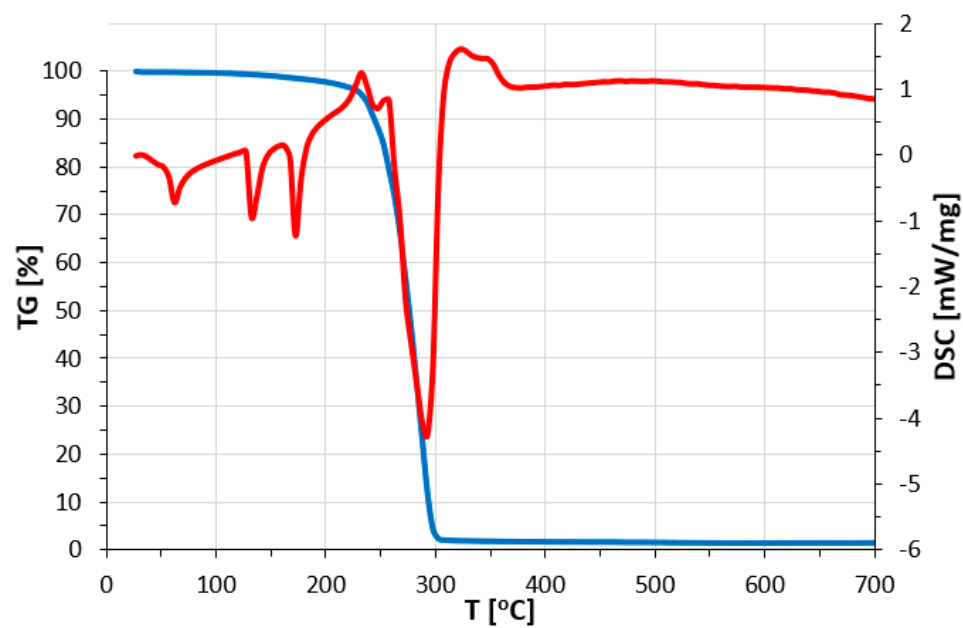

Figure S7. TG/DSC profiles for sample B2.

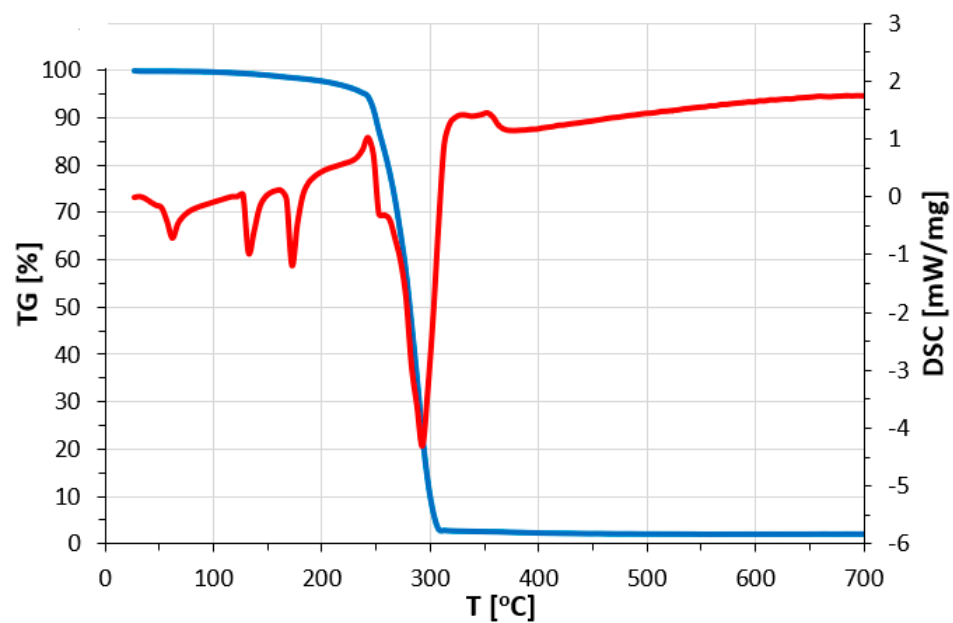

Figure S8. TG/DSC profiles for sample C2.

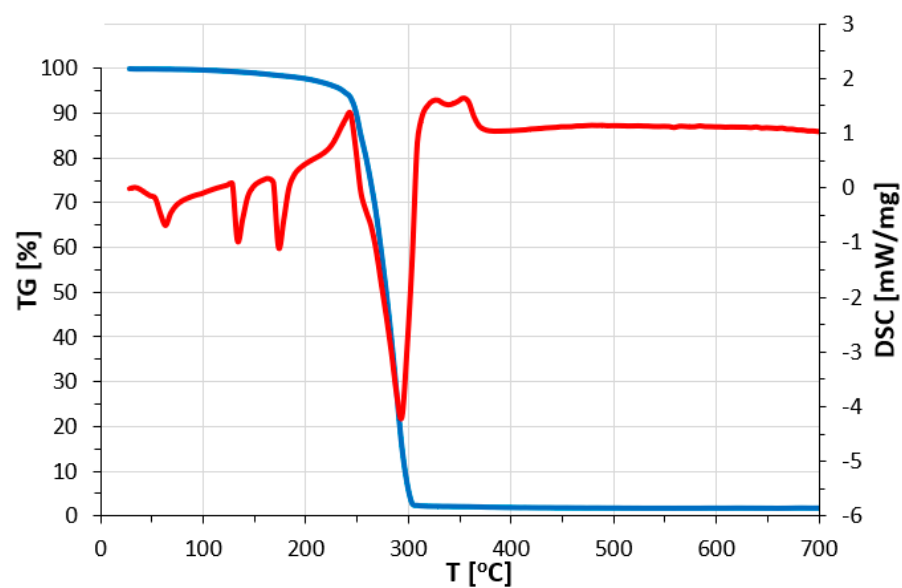

Figure S9. TG/DSC profiles for sample D2.

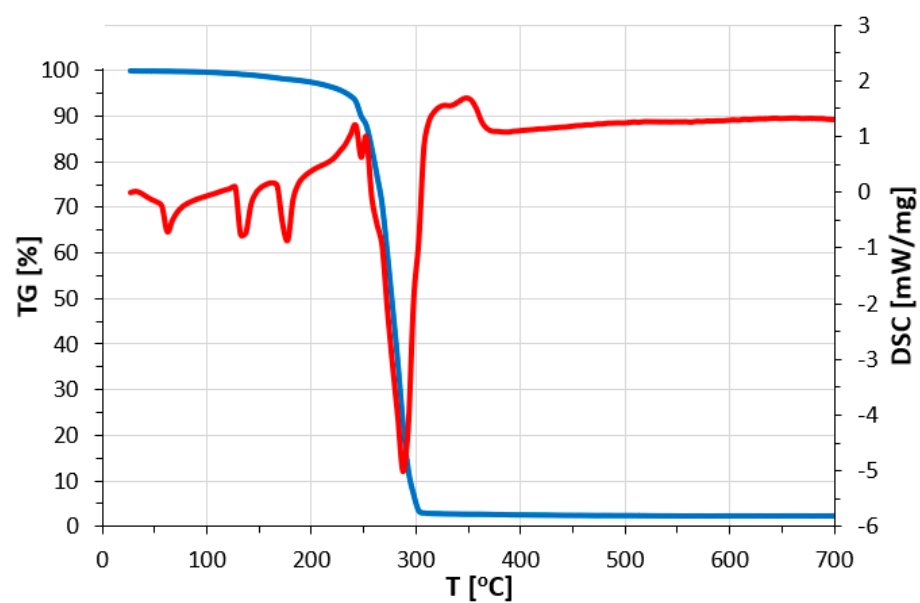

Figure S10. TG/DSC profiles for sample E2.

Table S1. EDS (Energy Dispersive Spectroscopy) chemical analysis of variously modified zeolite Y.

| Sample        | Chemical analysis (EDS) |               |              |               |               |                           |
|---------------|-------------------------|---------------|--------------|---------------|---------------|---------------------------|
|               | Si<br>[% wt.]           | Al<br>[% wt.] | O<br>[% wt.] | Na<br>[% wt.] | Mg<br>[% wt.] | Mg [% wt.]/<br>Na [% wt.] |
| zeolite Y     | 21.5                    | 7.9           | 65.6         | 5.0           | 0.0           | 0.0                       |
| Mg-Y impr     | 16.5                    | 5.9           | 68.2         | 5.2           | 4.2           | 0.81                      |
| Mg-Y ion-exch | 18.3                    | 8.2           | 69.0         | 1.8           | 2.7           | 1.50                      |
| Mg-Y son      | 19.4                    | 8.3           | 65.8         | 3.4           | 3.1           | 0.91                      |
